# Supplementary material for: High Throughput Analysis of Golgi Structure by Imaging Flow Cytometry
Source: PubMed Central journal article supplement (PMC5429768; doi:10.1038/s41598-017-00909-y), 2017-04-11

1 **High Throughput Analysis of Golgi Structure by Imaging Flow Cytometry**

2

3

**Supplemental Data**

4

5

6

7 Inbal Wortzel<sup>1</sup>, Gabriela Koifman<sup>2</sup>, Varda Rotter<sup>2</sup>, Rony Seger<sup>1</sup> and Ziv Porat<sup>3\*</sup>

8

9 <sup>1</sup>Dept. of Biological Regulation, <sup>2</sup>Dept. Of Molecular Cell Biology, <sup>3</sup>Life Sciences Core  
10 Facilities, the Weizmann Institute of Science, Rehovot, Israel.

11

12

13

14

15

16

17 \* Corresponding author: [Ziv.porat@weizmann.ac.il](mailto:Ziv.porat@weizmann.ac.il)

18

19

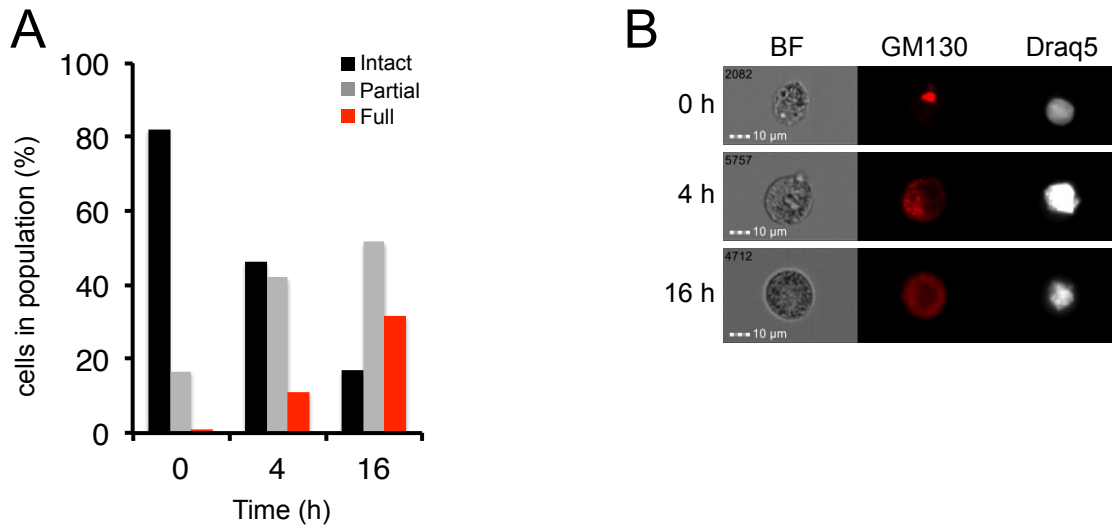

**Figure S1: analysis of COS7 cells for Golgi fragmentation by IFC**

COS7 cells were treated with 0.3  $\mu$ M nocodazole for the indicated times, then fixed and stained for GM130 and Draq5. **(A)** The 3 populations of the Golgi structure were analyzed at each time point. **(B)** Representative images of cells from each treatment.

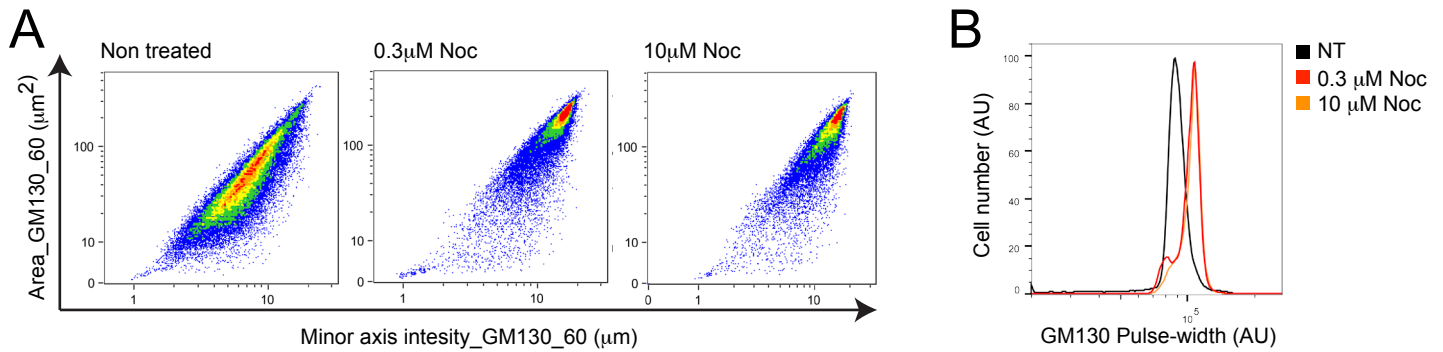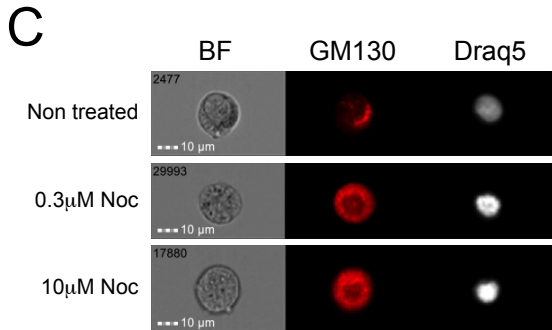

**Figure S2: Increasing nocodazole concentration has no further effect on Golgi fragmentation**

HeLa cells were treated with 0.3 or 10  $\mu\text{M}$  nocodazole for 16 h, then fixed and stained for GM130 and Draq5. **(A)** IFC analysis of the Golgi structure for each treatment. **(B)** Representative histograms of PulSA values (the width of the GM130 signal) for each treatment of two independent experiments (Shown is the single width of the Golgi staining). **(C)** Representative images of cells from each treatment.

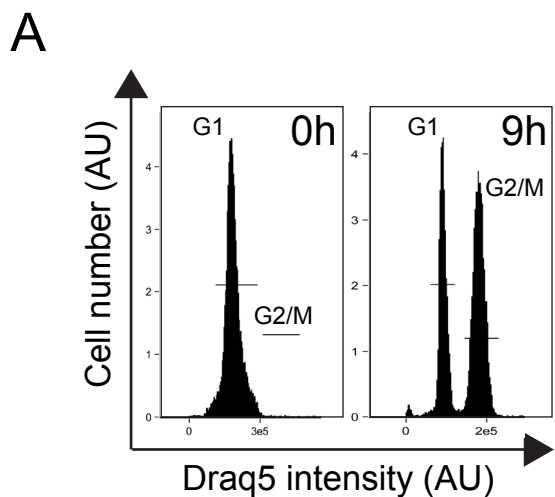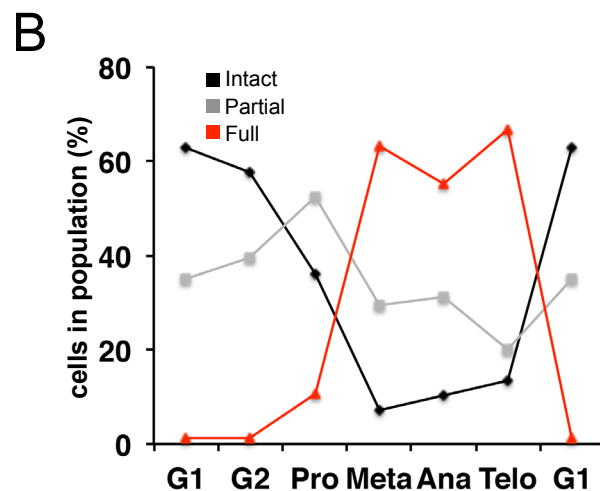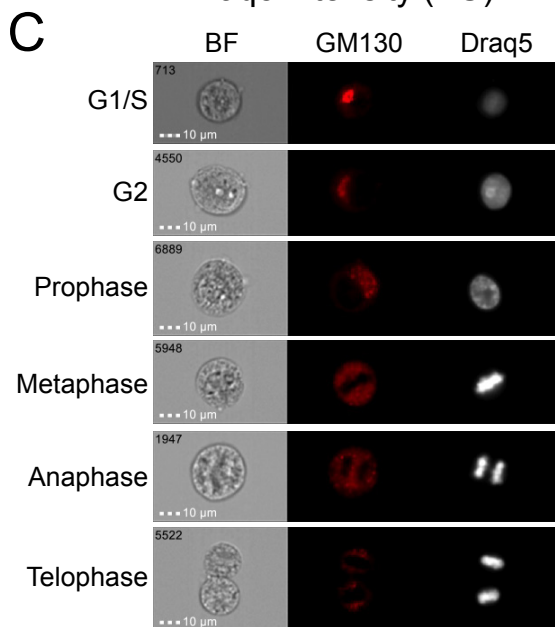

**Figure S3: In mitosis, the Golgi fragmentation starts at Prophase, and the Golgi assembly starts at Telophase**

HeLa cells were synchronized with the double thymidine block protocol. The cells were fixed at the G1/S border, or released for 9 hours, at the peak of mitosis, and fixed. The cells were stained for GRASP65 and Draq5 and analyzed by IFC. **(A)** Cell cycle histogram of the cells from the G1/S border (0 h) or at the peak of mitosis (9 h). **(B)** The 3 populations of the Golgi structure were analyzed at each phase of the cell cycle. **(C)** Representative images of cells from the cell cycle phases.

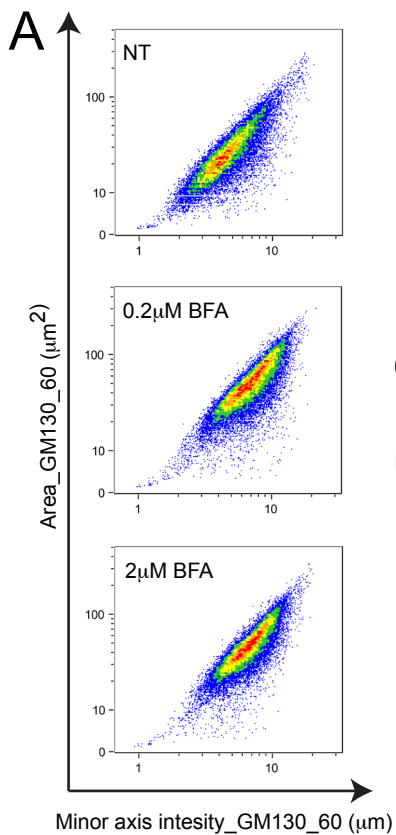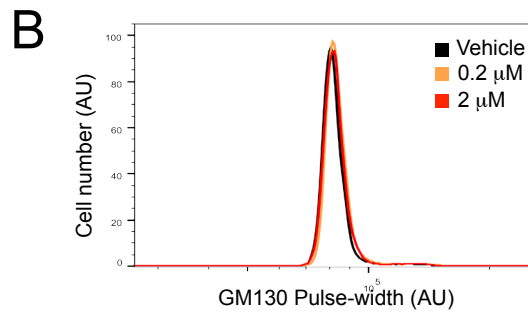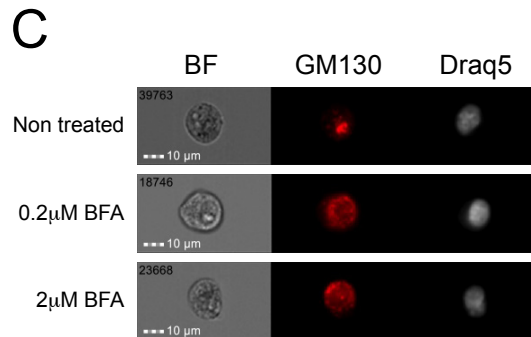

**Figure S4: Increasing BFA concentration has no further effect on Golgi fragmentation**

HeLa cells were treated with 0.2 or 2  $\mu\text{M}$  BFA for 60 min, then fixed and stained for GM130 (**A-C**) or Giantin (**D-F**) and Draq5. (**A, D**) IFC analysis of the Golgi structure for each treatment. (**B, E**) Representative histograms of PuISA values (the width of the signal) for each treatment of two independent experiments (Shown is the single width of the Golgi staining). (**C, F**) Representative images of cells from each treatment.

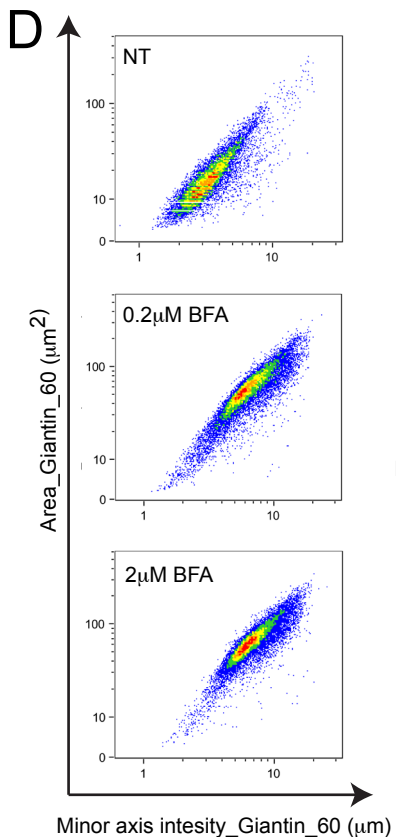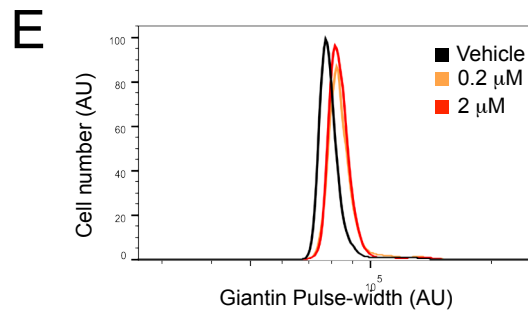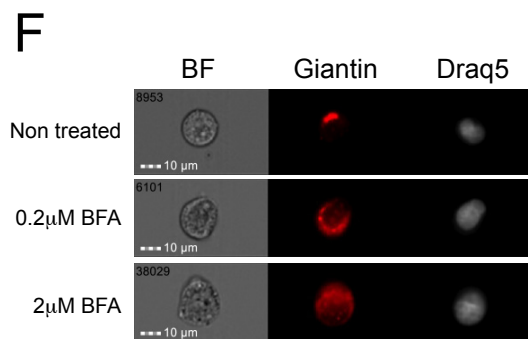

Supplement: 41598_2017_909_MOESM1_ESM.pdf [file 41598_2017_909_MOESM1_ESM.pdf]
